# Supplementary material
Source: Springer Nature journal article supplement (https://www.springermedizin.de/resource/supplementary/12885_2006_532_MOESM3_ESM.pdf/9469700)

A

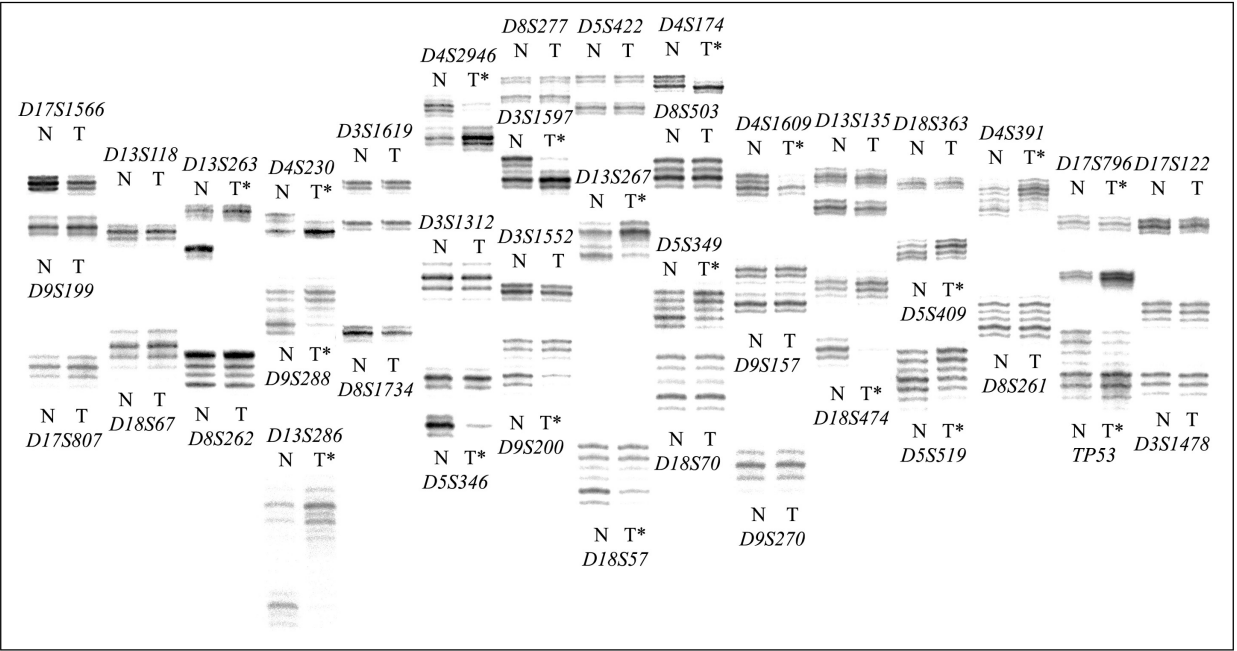

B

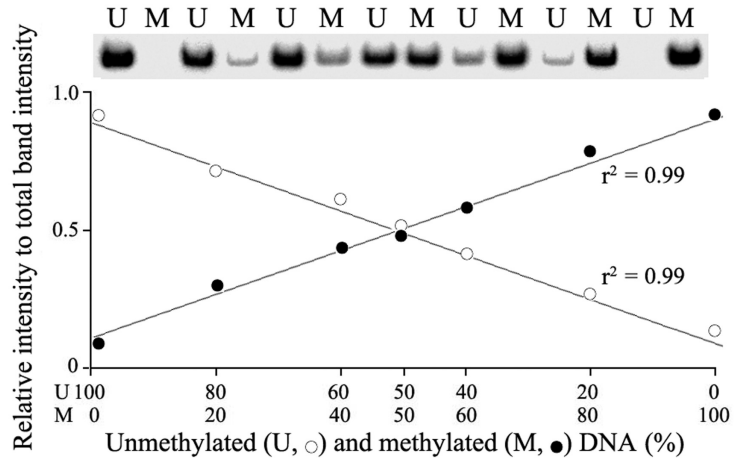

Supplement: MOESM3 [file 9469700]
